# Supplementary material for: HIV-1 Trans Infection via TNTs Is Impeded by Targeting C5aR
Source: MDPI journal article supplement (doi:10.3390/biom12020313), 2022-02-15

**Figure S1. TNTs formation in a DC/CD4<sup>+</sup> T cell co-culture is enhanced at 7 dpi with HIV/-C compared to lower time points.** TNT quantification on HIV/HIV-C-loaded i/mDCs in co-cultures with CD4<sup>+</sup> T cells at different time points after infection (24 hours, 48 hours, 4 days and 7 days). At 7 dpi, TNTs formation is enhanced compared to the tested lower time points. Three independent experiments were performed with two replicates each samples. Each dot represents a single measurement.

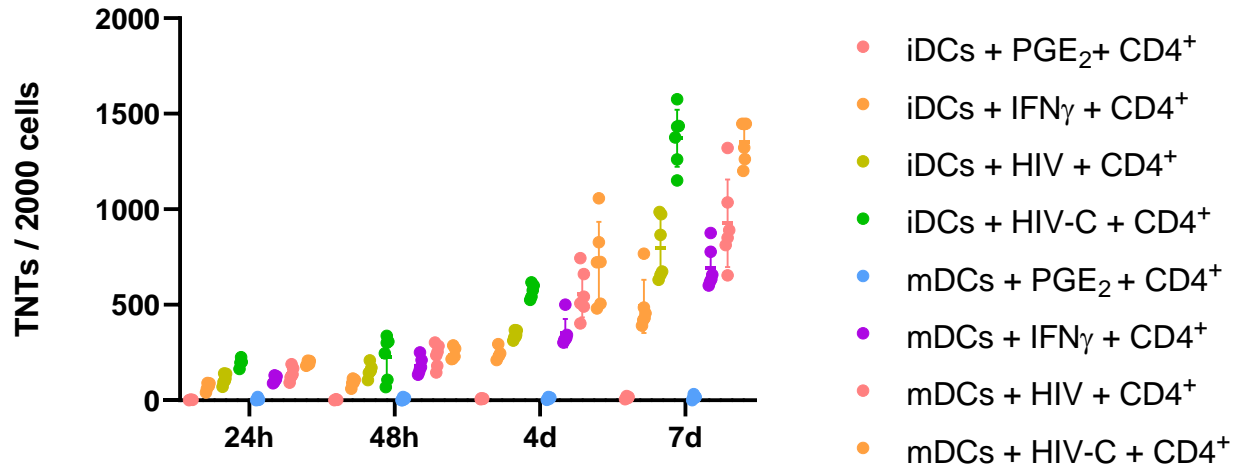

**Figure S2. AraC treatment decreases CD4<sup>+</sup> T cells infection with HIV.** Quantification of infection on 7 dpi supernatants from HIV/HIV-C-infected CD4<sup>+</sup> T cells with/without 24 h treatment with 1  $\mu$ M AraC. HIV-infected-CD4<sup>+</sup> T cells show a significantly lower, moderate productive infection compared to HIV ( $p < 0.0001$ ). HIV-infected-CD4<sup>+</sup> T cells have a higher productive infection than HIV-C –infected-CD4<sup>+</sup> T cells ( $p < 0.0001$ ). Three independent experiments were performed with two replicates each samples. Each dot represents a single measurement. Statistical significance was analyzed using GraphPad Prism software and ordinary one-way ANOVA.

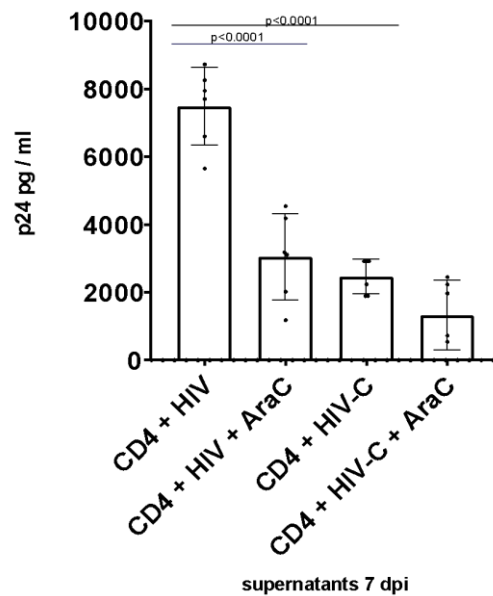

**Figure S3. TNTi treatment does not show any effect on CD4<sup>+</sup> T cells infection with HIV/-C.** Quantification of infection on 7 dpi supernatants from HIV/HIV-C-infected CD4<sup>+</sup> T cells with/without 24 h treatment with 20  $\mu$ M TNTi. HIV-C-infected CD4<sup>+</sup> T cells treated with TNTi do not show any difference in infection levels compared to HIV. Three independent experiments were performed with two replicates each samples. Each dot represents a single measurement. Statistical significance was analyzed using GraphPad Prism software and ordinary one-way ANOVA.

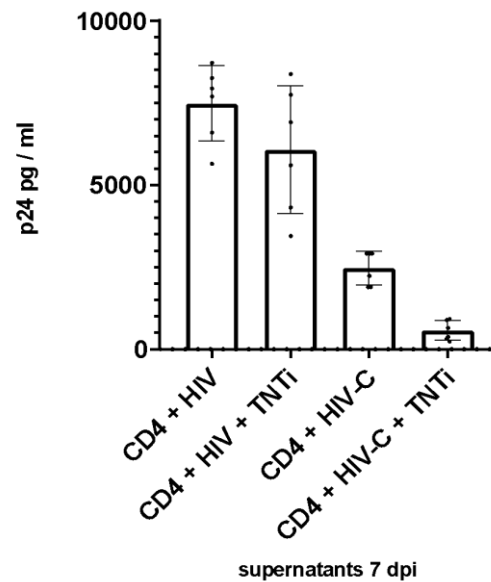

Supplement: s1 [file s1]
